# Supplementary material for: Regulatory considerations for developing remote measurement technologies for Alzheimer’s disease research
Source: PubMed Central journal article supplement — NPJ Digit Med. 2024 Sep 4;7:232. doi: 10.1038/s41746-024-01211-8 (PMC11375004; doi:10.1038/s41746-024-01211-8), 2024-09-04
Supplement: 41746_2024_1211_MOESM1_ESM.pdf [file 41746_2024_1211_MOESM1_ESM.pdf]

## SUPPLEMENTARY INFORMATION

### Interim results

Below are the interim results presented to the EMA to receive qualification advice. Differences in the numbers of participants can be attributed to various factors including updates to smart phones and operating systems, changes in RMT design, technical or software issues, acceptance of RMT by ethics committees and limitations in their use in advanced disease stages.<sup>1</sup>

**Supplementary Table 1: Selected RMTs and Assessment of Functional Domains**

| <b>RMT</b>                                                                                                                                             | <b>RMT Assessment of Functional Domains</b>                                                                                                                                                             |
|--------------------------------------------------------------------------------------------------------------------------------------------------------|---------------------------------------------------------------------------------------------------------------------------------------------------------------------------------------------------------|
| Altoida Neuro Motor Index Application Software (in-clinic assessment and remote measurements). Class 1 medical device CE marked EC Directive 93/42/EEC | Measures spatial navigation and motor function via simulation of a complex ADL exercise using augmented reality.                                                                                        |
| Physilog sensor (Gait Up) (in-clinic assessment)                                                                                                       | Accelerometer and gyroscope-based measurement of various parameters of gait measured within a dual-tasking paradigm as well as timed up-and-go (TUG) functional mobility measurement.                   |
| Amsterdam-iADL ePRO (in-clinic assessment and remote measurements)                                                                                     | Online questionnaire that collects information from caregiver about difficulties at work, planning skills and memory, household management, use of technology, and difficulties driving from caregiver. |
| Mezurio app (remote assessment)                                                                                                                        | Active and passive measurement across a variety of domains including planning skills, new skill acquisition, speech, motivation.                                                                        |
| Banking app (in-clinic assessment)                                                                                                                     | Measures ability to manage finances via a simulated bank withdrawal scenario.                                                                                                                           |
| RADAR-base (pRMT) app (remote assessment)                                                                                                              | Measures mobility, displacement, and localization as well as communication and social functioning.                                                                                                      |
| Axivity AX3 sensor (remote assessment)                                                                                                                 | Accelerometry-based measurement of sleep, physical activity, and circadian rhythms.                                                                                                                     |

|                                                  |                                                                                              |
|--------------------------------------------------|----------------------------------------------------------------------------------------------|
| Fitbit Charge 3 sensor (remote assessment)       | Measures heart rate and provides information about sleep and daytime activity.               |
| Vicon Autographer (optional) (remote assessment) | Wearable camera to provide context to measurements from sensors, such as Fitbit and Axivity. |

Adapted from Muurling M., et al.<sup>13</sup> RMT: Remote monitoring Technology, ePRO: Electronic patient-reported outcomes, iADL: Instrumental Activities of Daily Living, pRMT: RADAR-base passive RMT app

## Established clinical measures for functional domains

**Supplementary Table 2: Functional domain composite scores**

| Functional Domain                                        | Clinical Tests and Questionnaires           | Sub-question                                              |
|----------------------------------------------------------|---------------------------------------------|-----------------------------------------------------------|
| 1. Difficulties at work                                  | Amsterdam iADL <sup>2</sup>                 | Q20                                                       |
| 2. Spatial navigation & memory                           | MMSE <sup>3</sup>                           | MMSE Q1, Q2                                               |
|                                                          | Amsterdam iADL <sup>2</sup>                 | Q29                                                       |
|                                                          | Rey complex figure <sup>4,5</sup>           | Recall score                                              |
|                                                          | Ecog <sup>6</sup>                           | Memory                                                    |
|                                                          | Ecog <sup>6</sup>                           | Visual perception                                         |
| 3. Planning skills & memory required for task completion | Ecog <sup>6</sup>                           | Planning                                                  |
| 4. Managing finances                                     | Amsterdam iADL <sup>2</sup>                 | Q11, Q14-Q17                                              |
| 5. Self-care                                             | EQ5D <sup>7</sup>                           | Q2                                                        |
|                                                          | Amsterdam iADL <sup>2</sup>                 | Q30 (medication)                                          |
|                                                          | ADCS-ADL <sup>8</sup>                       | Q5, Q6A, Q6B                                              |
| 6. Self-management, eg, running errands & shopping       | Amsterdam iADL <sup>2</sup>                 | R1-R6                                                     |
|                                                          | Ecog <sup>6</sup>                           | Organisation                                              |
| 7. Acquiring new skills                                  | No questionnaire available                  |                                                           |
| 8. Sleep quality & circadian rhythms                     | Pittsburgh Sleep Quality Index <sup>9</sup> | Sum of 7 component scores                                 |
|                                                          | ESS <sup>10</sup>                           | Sum of 8 component scores                                 |
|                                                          | NPI <sup>11</sup>                           | Q11 (sleep): frequency * severity                         |
| 9. Use of technology/devices                             | Smartphone use                              | Total score task 1                                        |
|                                                          | Amsterdam iADL <sup>2</sup>                 | Q7-Q10, Q22-Q26                                           |
|                                                          | ADCS-ADL <sup>8</sup>                       | Q7, Q23                                                   |
| 10. Dysnomia, word finding difficulties                  | Verbal fluency                              | Sum of 3 phonemic and 1 semantic (animals) fluency trials |
|                                                          | Boston naming test <sup>12</sup>            | Total score/maximal score*100 (%)                         |
| 11. Gait                                                 | EQ5D <sup>7</sup>                           | Q1                                                        |
| 12. Difficulties driving                                 | Amsterdam iADL <sup>2</sup>                 | R27, R28                                                  |
| 13. Interpersonal interaction                            | Social Functioning Scale                    | Average score sections 1-3                                |
| 14. Motivation, signs of apathy or withdrawal            | Geriatric Depression Scale                  | GDS total score                                           |
|                                                          | NPI <sup>11</sup>                           | Q7 (apathy): frequency * severity                         |

|  |                          |                         |
|--|--------------------------|-------------------------|
|  | Social Functioning Scale | Score part 1 withdrawal |
|--|--------------------------|-------------------------|

Adapted from Muurling M., et al. (2021)<sup>13</sup> Abbreviations: Ecog: Everyday Cognition Scale, ADCS-ADL: Alzheimer's Disease Cooperative Study Activities of Daily Living, EQ5D: European Quality of Life, 5-Dimension, ESS: Epworth Sleepiness scale, iADL: instrumental Activities of Daily Living, MMSE: Mini Mental State Examination, GDS: Geriatric Depression Scale, NPI: Neuro Psychiatric Inventory, Q: question.

**Supplementary Figure 1: Functional domain scores per study group. Each dot represents one participant. The y-axis shows the average z-scores**

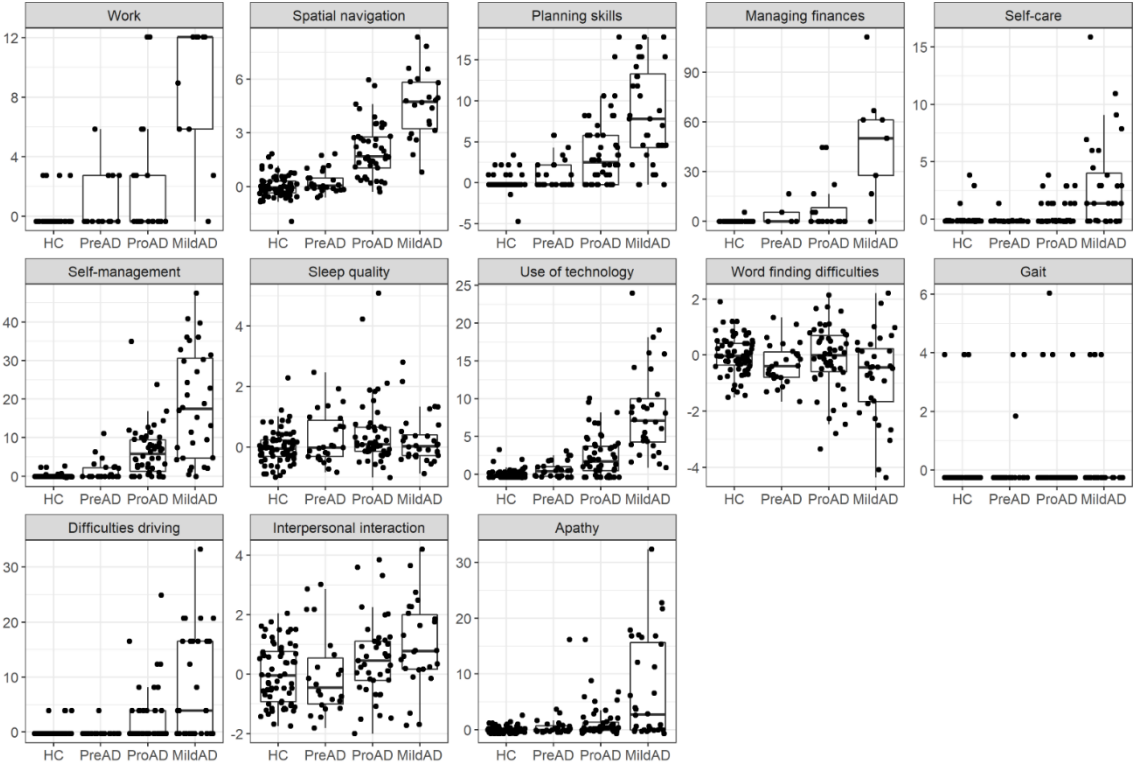

PreAD: Preclinical AD, ProAD: Prodromal AD, MildAD: Mild-to-moderate AD dementia, HC: Age-matched healthy controls.

## Known group validity

### 1. Banking application

**Supplementary Table 3: The Banking App metrics for each group**

| Features                          | HC<br>N=60       | PreAD<br>N=23    | ProAD<br>N=44    | MildAD<br>N=29   | p-value | Group differences                                                                                                                                           |
|-----------------------------------|------------------|------------------|------------------|------------------|---------|-------------------------------------------------------------------------------------------------------------------------------------------------------------|
| Correct attempts                  | 1 [1-1]          | 1 [1-1]          | 1 [1-1]          | 1 [1-1]          | P=0.185 | -                                                                                                                                                           |
| Correct PIN attempts              | 1 [1-1]          | 1 [1-1]          | 1 [1-1]          | 1 [1-1]          | P=0.325 | -                                                                                                                                                           |
| Correct amount attempts           | 1 [1-1]          | 1 [1-1]          | 1 [1-1]          | 1 [1-1]          | P=0.367 | -                                                                                                                                                           |
| Total correct steps duration [s]  | 56.48<br>(62.83) | 46.60<br>(25.66) | 75.83<br>(62.75) | 92.56<br>(58.22) | P<0.001 | MildAD>HC,<br>0.49 [0.12,<br>0.87]<br>MildAD>PreAD<br>0.6 [0.15,<br>1.05]                                                                                   |
| Total correct PIN duration [s]    | 39.33<br>(62.14) | 29.61<br>(24.58) | 47.33<br>(52.80) | 50.78<br>(36.91) | P=0.101 |                                                                                                                                                             |
| Total correct amount duration [s] | 11.93<br>(8.22)  | 10.25<br>(5.98)  | 17.17<br>(11.75) | 28.58<br>(29.95) | P<0.001 | ProAD>HC,<br>0.35 [0.02,<br>0.69]<br>MildAD>HC,<br>0.64 [0.25,<br>1.03]<br>ProAD>PreAD<br>,<br>0.45 [0.02,<br>0.88]<br>MildAD>PreAD<br>0.74 [0.27,<br>1.21] |

Numbers are displayed as median [Q1-Q3] for the Attempts features and mean (SD) for Duration features. The p-values are from ANCOVA's (for the Duration features), corrected for age, sex, and years of education. If ANCOVA showed significant differences, post-hoc Tukey HSD tests were done. The last column shows the statistically significant group differences as Group 1 > Group 2 with adjusted estimates and confidence intervals in brackets. For the Attempt features Mann-Whitney was performed, where no group differences could be found. PreAD: Preclinical AD, ProAD: Prodromal AD, MildAD: Mild-to-moderate AD dementia, HC: Age-matched healthy controls.

## 2. Fitbit

**Supplementary Table 4: Descriptive Fitbit statistics for each study group.**

| <b>Features</b>          | <b>HC<br/>N=53</b>   | <b>PreAD<br/>N=19</b> | <b>ProAD<br/>N=29</b> | <b>MildAD<br/>N=20</b> | <b>p-value</b> | <b>Group<br/>differences</b> |
|--------------------------|----------------------|-----------------------|-----------------------|------------------------|----------------|------------------------------|
| Mean heart rate          | 71.06<br>(6.93)      | 71.41<br>(7.48)       | 68.39<br>(7.4)        | 68.75<br>(5.77)        | P=0.116        | -                            |
| Minimal heart rate       | 52.78<br>(5.92)      | 54.28<br>(6.01)       | 51.71<br>(6.52)       | 51.06<br>(5.58)        | P=0.160        | -                            |
| Maximal heart rate       | 121.32<br>(8.42)     | 120.35<br>(9.44)      | 118.96<br>(10.32)     | 117.4<br>(8.7)         | P=0.380        | -                            |
| Mean number of steps     | 7458.48<br>(3392.54) | 6980.76<br>(3100.37)  | 6708.39<br>(4034.63)  | 6478.2<br>(4262.62)    | P=0.804        | -                            |
| Hours asleep             | 6.46<br>(1.43)       | 6.36<br>(1.74)        | 5.88<br>(1.44)        | 6.03<br>(1.83)         | P=0.669        | -                            |
| Hours awake during night | 0.64<br>(0.2)        | 0.75<br>(0.24)        | 0.66<br>(0.25)        | 0.64<br>(0.2)          | P=0.331        | -                            |

Numbers are displayed as mean (SD). Heart rate is in beats per minute. The p-values are from ANCOVA's, corrected for age, sex and years of education. No group difference post hoc Tukey HSD test was performed due to non-significant results from ANCOVA. PreAD: Preclinical AD, ProAD: Prodromal AD, MildAD: Mild-to-moderate AD dementia, HC: Age-matched healthy controls.

### 3. Activity

**Supplementary Table 5: Descriptive Activity statistics for each study group**

| <b>Features</b>        | <b>HC<br/>N=49</b> | <b>PreAD<br/>N=18</b> | <b>ProAD<br/>N=30</b> | <b>MildAD<br/>N=20</b> | <b>p-value</b> | <b>Group<br/>differences</b> |
|------------------------|--------------------|-----------------------|-----------------------|------------------------|----------------|------------------------------|
| Acceleration magnitude | 24.31<br>(5.48)    | 20.19<br>(5.77)       | 22.17<br>(7.18)       | 22.78<br>(8.63)        | P=0.110        | -                            |
| Time sedentary [h]     | 7.59<br>(1.64)     | 8.42<br>(1.38)        | 8.34<br>(2.27)        | 8.19<br>(2.18)         | P=0.267        | -                            |
| Light activity [h]     | 7.04<br>(1.46)     | 6.14<br>(1.51)        | 6.27<br>(2.13)        | 5.88<br>(2.29)         | P=0.092        | -                            |
| MVPA [h]               | 0.43<br>(0.33)     | 0.3<br>(0.23)         | 0.45<br>(0.42)        | 0.41<br>(0.33)         | P=0.269        | -                            |
| Sleep [h]              | 8.94<br>(1.25)     | 9.14<br>(1.1)         | 8.94<br>(1.28)        | 9.52<br>(1.28)         | P=0.194        | -                            |

Numbers are displayed as mean (SD). The p-values are from ANCOVA, corrected for age, sex, and years of education. MVPA = Moderate to vigorous physical activity. No post hoc Tukey HSD test was performed due to non-significant ANCOVA test. MVPA: Moderate-to-vigorous physical activity per day. PreAD: Preclinical AD, ProAD: Prodromal AD, MildAD: Mild-to-moderate AD dementia, HC: Age-matched healthy controls.

#### 4. Physilog (Dual Task)

**Supplementary Table 6: Descriptive Physilog statistics of DTE (Dual Task Effect)**

| <b>Features<br/>[DTE - %]</b> | <b>HC<br/>N=47</b>         | <b>PreAD<br/>N=23</b>      | <b>ProAD<br/>N=36</b>       | <b>MildAD<br/>N=21</b>       | <b>p-value</b> | <b>Group<br/>differences</b>                                                              |
|-------------------------------|----------------------------|----------------------------|-----------------------------|------------------------------|----------------|-------------------------------------------------------------------------------------------|
| AVG - Cadence                 | -3.30<br>[-6.85 -<br>1.24] | -4.05<br>[-6.14 -<br>2.16] | -6.69<br>[-14.03 -<br>3.22] | -8.68<br>[-19.93 -<br>2.51]  | P=0.297        |                                                                                           |
| SD - Cadence                  | 12.53<br>[-23.45<br>38.78] | 6.24<br>[-15.77<br>39.67]  | 9.24<br>[-6.91<br>56.47]    | 34.29<br>[3.20<br>86.95]     | P=0.190        |                                                                                           |
| AVG - Double support          | 0.72<br>[-1.98<br>8.99]    | 2.91<br>[-2.75<br>5.50]    | 6.28<br>[2.30<br>15.38]     | 3.64<br>[-4.99<br>23.99]     | P=0.618        |                                                                                           |
| SD - Double support           | 2.14<br>[-18.89<br>33.19]  | -7.10<br>[-21.65<br>17.43] | -7.61<br>[-24.25<br>115.53] | 23.46<br>[-15.59<br>53.26]   | P=0.057        |                                                                                           |
| AVG - Foot flat rate          | 2.43<br>[0.23<br>5.86]     | 2.87<br>[1.03<br>6.38]     | 5.60<br>[2.23<br>11.85]     | 10.20<br>[1.86<br>14.82]     | P=0.062        |                                                                                           |
| SD - Foot flat rate           | -7.52<br>[-30.50<br>13.16] | -6.14<br>[-17.79<br>1.86]  | 5.38<br>[-16.73<br>16.82]   | 17.62<br>[-3.71<br>32.71]    | P=0.002        | ProAD ><br>PreAD *<br>1.55 [0.42,<br>2.69]<br>MildAD ><br>PreAD *<br>1.78 [0.65,<br>2.92] |
| AVG - Gait speed              | -3.86<br>[-10.14<br>-0.65] | -5.50<br>[-8.82 -<br>2.19] | -9.42<br>[-17.60 -<br>5.12] | -14.81<br>[-25.06 -<br>4.06] | P=0.027        |                                                                                           |
| SD - Gait speed               | -2.02<br>[-15.00<br>15.16] | -6.97<br>[-18.48<br>7.44]  | -3.35<br>[-14.11<br>15.73]  | 13.98<br>[-9.88<br>50.37]    | P=0.014        |                                                                                           |
| AVG - Gait cycle time         | 3.43<br>[1.05<br>7.55]     | 4.23<br>[2.22<br>6.63]     | 8.03<br>[3.12<br>17.34]     | 11.32<br>[2.29<br>31.25]     | P=0.032        |                                                                                           |
| SD - Gait cycle time          | 18.18<br>[-24.64<br>82.85] | 25.63<br>[-9.09<br>56.32]  | 37.80<br>[3.39<br>142.78]   | 91.00<br>[3.43<br>315.13]    | P=0.135        |                                                                                           |
| AVG - Path length             | 0.16<br>[-0.14<br>0.52]    | 0.04<br>[-0.33<br>0.37]    | 0.23<br>[-0.31<br>0.78]     | 0.03<br>[-0.73<br>0.61]      | P=0.133        |                                                                                           |
| SD - Path length              | 0.72<br>[-13.47<br>40.50]  | -6.24<br>[-15.43<br>7.40]  | 3.47<br>[-19.71<br>61.22]   | -6.72<br>[-36.56<br>37.37]   | P=0.361        |                                                                                           |



|              |                           |                           |                           |                           |         |                                             |
|--------------|---------------------------|---------------------------|---------------------------|---------------------------|---------|---------------------------------------------|
| AVG - Stance | 0.34<br>[-0.56<br>1.33]   | 0.56<br>[-0.35<br>0.99]   | 1.42<br>[0.07<br>2.35]    | 0.98<br>[-0.25<br>3.50]   | P=0.127 |                                             |
| SD - Stance  | 0.74<br>[-16.76<br>25.03] | -2.29<br>[-24.81<br>6.12] | 1.13<br>[-15.96<br>51.31] | 32.93<br>[12.93<br>83.65] | P=0.017 | MildAD ><br>PreAD *<br>1.96 [0.33,<br>3.59] |

Numbers are displayed as median and inter-quartile distance. The p-values are from ANCOVAs, corrected for age, sex, years of education, BMI, GDSS score, and presence of diabetes diagnosis. P-values rounded up to the third digit after comma. If ANCOVA showed significant differences, post-hoc Tukey HSD tests were done. The last column shows the significant group differences as group 1 > group 2 with adjusted estimates and confidence intervals in brackets. For foot flat, age factor was also significant. For gait speed, gait cycle time, and path length the overall ANCOVA tests was statistically significant while no significant pair-wise comparisons using Tukey HSD were found. Highlighted table rows represent significant features.

5. Physilog (Timed up-and-go, TUG)

**Supplementary Table 7: Descriptive Physilog statistics of TUG features**

| Features                           | HC<br>N=49                   | PreAD<br>N=23                | ProAD<br>N=42                | MildAD<br>N=26              | p-value | Group differences                                                                |
|------------------------------------|------------------------------|------------------------------|------------------------------|-----------------------------|---------|----------------------------------------------------------------------------------|
| Cadence<br>[step/min<br>]          | 113.21<br>[105.77<br>126.08] | 111.40<br>[107.65<br>118.68] | 118.30<br>[104.07<br>127.00] | 104.77<br>[94.22<br>109.16] | P=0.004 | ProAD>MildAD *<br>8.18 [-2.69,<br>19.06]<br>HC>MildAD*<br>11.77 [2.76,<br>20.78] |
| Gait<br>speed<br>[m/s]             | 1.06<br>[0.97<br>1.21]       | 1.11<br>[0.95<br>1.17]       | 1.12<br>[0.90<br>1.28]       | 0.89<br>[0.68<br>1.05]      | P=0.005 | HC>MildAD *<br>0.17 [0.04,<br>0.30]<br>ProAD>MildAD*<br>0.15 [0.01,<br>0.28]     |
| N. Gait<br>Cycles<br>[#]           | 6.00<br>[5.00<br>7.00]       | 5.00<br>[5.00<br>7.00]       | 6.00<br>[5.00<br>7.00]       | 7.00<br>[6.00<br>8.00]      | P=0.154 |                                                                                  |
| Sit to<br>stand<br>angle<br>[deg]  | 37.99<br>[31.30<br>43.50]    | 44.26<br>[37.40<br>51.92]    | 38.61<br>[28.84<br>47.09]    | 37.97<br>[34.78<br>41.57]   | P=0.302 |                                                                                  |
| Sit to<br>stand<br>duration<br>[s] | 1.08<br>[0.93<br>1.19]       | 1.14<br>[1.00<br>1.35]       | 1.02<br>[0.95<br>1.22]       | 1.22<br>[1.03<br>1.40]      | P=0.011 | MildAD>HC *<br>0.11 [0.02,<br>0.19]                                              |
| Total time<br>[s]                  | 8.74<br>[7.67<br>9.58]       | 8.40<br>[7.38<br>10.31]      | 8.50<br>[7.26<br>9.43]       | 9.76<br>[8.53<br>11.69]     | P=0.048 | Mild AD>HC *<br>0.14 [0.007,<br>0.27]                                            |
| Turn<br>duration<br>[s]            | 2.31<br>[2.07<br>2.52]       | 2.46<br>[2.09<br>2.83]       | 2.31<br>[1.98<br>2.69]       | 2.56<br>[2.23<br>3.14]      | P=0.485 |                                                                                  |
| Turn to sit<br>duration<br>[s]     | 2.41<br>[2.17<br>2.69]       | 2.43<br>[2.15<br>2.69]       | 2.33<br>[2.10<br>2.73]       | 2.66<br>[2.24<br>3.21]      | P=0.193 |                                                                                  |

Numbers are displayed as median and interquartile distance. Given that the distributions are skewed, medians and interquartile ranges have been provided for description instead of means and standard deviations. The p-value of ANCOVA overall group differences corrected for age, sex, years of education, BMI, GDSS score, and presence of diabetes diagnosis. P-values rounded up to third digit after comma. If ANCOVA showed significant differences, post-hoc Tukey HSD tests were done. The last column shows the significant group differences as group 1 > group 2 with adjusted estimates and confidence intervals in brackets. PreAD: Preclinical AD, ProAD: Prodromal AD, MildAD: Mild-to-moderate AD dementia, HC: Age-matched healthy controls.

6. Altoida

**Supplementary Table 8: Descriptive Altoida statistics for each study group**

| Features                            | HC<br>N=49       | PreAD<br>N=18    | ProAD<br>N=29    | MildAD<br>N=8    | p-value | Group differences                                                                                                                                                                             |
|-------------------------------------|------------------|------------------|------------------|------------------|---------|-----------------------------------------------------------------------------------------------------------------------------------------------------------------------------------------------|
| DNS                                 | 69.18<br>(22.19) | 62.27<br>(23.05) | 42.66<br>(25.63) | 24.57<br>(23.35) | P<0.001 | HC>ProAD<br>-0.62 [-0.97, -0.27]<br>HC>MildAD<br>-1.39[-1.95, -0.83]<br>PreAD>ProAD<br>-0.5[-0.95, -0.06]<br>PreAD>MildAD<br>-1.27 [-1.9, -0.64]<br>ProAD>MildAD<br>-0.77 [-1.36, -0.18]      |
| DNS-<br>Amyloid                     | 30.41<br>(23.69) | 32.48<br>(21.05) | 24.42<br>(24.51) | 5.65<br>(0.81)   | P<0.001 | HC>MildAD<br>-1.35 [-2.2, -0.49]<br>PreAD>MildAD<br>-1.52[-2.47, -0.56]<br>ProAD>MildAD<br>-1 [-1.9, -0.1]                                                                                    |
| Perceptual<br>Motor<br>Coordination | 49.39<br>(5.99)  | 48.53<br>(5.29)  | 43.56<br>(6.13)  | 35.19<br>(5.44)  | P<0.001 | HC>ProAD<br>-5.82 [-9.42, -2.22]<br>HC>MildAD<br>-14.2[-20.06, -8.34]<br>PreAD>ProAD<br>-4.97[-9.58, -0.36]<br>PreAD>MildAD<br>-13.35[-19.87, -6.82]<br>ProAD>MildAD<br>-8.38 [-14.51, -2.24] |
| Complex<br>Attention                | 48.56<br>(11.84) | 48.77<br>(8.56)  | 38.90<br>(7.87)  | 35.37<br>(9.51)  | P<0.001 | HC>ProAD<br>-0.21 [-0.35, -0.08]<br>HC>MildAD<br>-0.32 [-0.54, -0.09]<br>PreAD>ProAD<br>-0.23 [-0.41, -0.06]<br>PreAD>MildAD<br>-0.34 [-0.59, -0.09]                                          |
| Cognitive<br>Processing<br>Speed    | 48.67<br>(10.50) | 47.34<br>(8.62)  | 38.09<br>(7.30)  | 34.07<br>(6.34)  | P<0.001 | HC>ProAD<br>-0.24 [-0.36, -0.12]<br>HC>MildAD<br>-0.35 [-0.55, -0.15]<br>PreAD>ProAD<br>-0.22 [-0.38--0.06]                                                                                   |

|                    |                  |                  |                  |                  |         |                                                                                                                                                     |
|--------------------|------------------|------------------|------------------|------------------|---------|-----------------------------------------------------------------------------------------------------------------------------------------------------|
|                    |                  |                  |                  |                  |         | PreAD>MildAD<br>-0.33 [-0.55, -0.11]                                                                                                                |
| Inhibition         | 47.89<br>(12.07) | 49.34<br>(10.06) | 39.47<br>(11.05) | 36.04<br>(14.10) | P<0.001 | HC>ProAD<br>-0.2 [-0.36, -0.04]<br>HC>MildAD<br>-0.31 [-0.57, -0.05]<br>PreAD>ProAD<br>-0.24 [-0.44, -0.03]<br>PreAD>MildAD<br>-0.35 [-0.64, -0.06] |
| Flexibility        | 39.02<br>(11.58) | 38.19<br>(10.21) | 39.41<br>(11.19) | 43.18<br>(11.11) | P=0.738 |                                                                                                                                                     |
| Visual Perception  | 46.98<br>(11.74) | 46.94<br>(9.17)  | 36.30<br>(8.69)  | 33.84<br>(9.47)  | P<0.001 | HC>ProAD<br>-0.26 [-0.4, -0.11]<br>HC>MildAD<br>-0.33 [-0.57, -0.09]<br>PreAD>ProAD<br>-0.27 [-0.46, -0.08]<br>PreAD>MildAD<br>-0.34 [-0.61, -0.08] |
| Planning           | 47.00<br>(13.99) | 46.39<br>(9.60)  | 36.49<br>(8.69)  | 33.79<br>(10.63) | P<0.001 | HC>ProAD<br>-0.24 [-0.4, -0.07]<br>HC>MildAD<br>-0.32 [-0.59, -0.05]<br>PreAD>ProAD<br>-0.25 [-0.46, -0.03]<br>PreAD>MildAD<br>-0.33 [-0.64, -0.03] |
| Prospective Memory | 53.07<br>(11.71) | 53.05<br>(9.35)  | 50.88<br>(13.50) | 45.39<br>(16.20) | P=0.354 |                                                                                                                                                     |
| Spatial Memory     | 49.30<br>(10.17) | 47.50<br>(7.75)  | 40.61<br>(7.99)  | 32.83<br>(7.90)  | P<0.001 | HC>ProAD<br>-8.68 [-14.23, -3.14]<br>HC>MildAD<br>-16.46 [-25.49, -7.44]<br>PreAD>MildAD<br>-14.67 [-24.73, -4.61]                                  |
| Fine Motor Skills  | 51.63<br>(11.33) | 53.29<br>(9.09)  | 51.14<br>(12.12) | 53.78<br>(4.37)  | P=0.872 |                                                                                                                                                     |
| Gait               | 48.20<br>(11.27) | 45.05<br>(9.45)  | 40.86<br>(10.56) | 37.56<br>(11.59) | P=0.009 | HC>ProAD<br>-7.34 [-13.96, -0.72]                                                                                                                   |

The numbers are displayed as mean (SD). All scores are probability scores. The p-values are from ANCOVA analyses, corrected for age, sex and years of education. If ANCOVA showed significant differences, post-hoc Tukey HSD tests were done. The last column shows the significant group differences as group 1 > group 2 as well as adjusted estimates and confidence intervals in brackets.

DNS: Digital Neuro Signature, PreAD: Preclinical AD, ProAD: Prodromal AD, MildAD: Mild-to-moderate AD dementia, HC: Age-matched healthy controls.

7. Mezurio

**Supplementary Table 9: Characteristics of Mezurio Story Time features stratified by the disease group stages.**

| Story Time Features                        | Overall<br>N=153    | HC<br>N=65          | PreAD<br>N=25       | ProAD<br>N=38       | MildAD<br>N=25      | p-value             |
|--------------------------------------------|---------------------|---------------------|---------------------|---------------------|---------------------|---------------------|
| <b>Speech Timing Features</b>              |                     |                     |                     |                     |                     |                     |
| Articulation Rate                          | 4.04 (0.68)         | 4.20 (0.54)         | 4.18 (0.63)         | 3.89 (0.70)         | 3.72 (0.87)         | 0.007 <sup>a</sup>  |
| Speaking Rate                              | 2.40 (0.69)         | 2.62 (0.61)         | 2.63 (0.57)         | 2.23 (0.66)         | 1.89 (0.71)         | <0.001 <sup>b</sup> |
| Recording Duration                         | 79.71<br>(33.86)    | 73.50<br>(30.54)    | 86.22<br>(36.10)    | 86.62<br>(34.57)    | 78.36<br>(37.26)    | 0.198               |
| Number of Syllables                        | 177.56<br>(95.63)   | 176.95<br>(80.45)   | 216.25<br>(125.69)  | 183.78<br>(94.83)   | 130.97<br>(83.00)   | 0.016 <sup>c</sup>  |
| Number of Pauses                           | 26.07<br>(13.30)    | 24.57<br>(13.23)    | 29.63<br>(14.32)    | 26.56<br>(12.81)    | 25.56<br>(13.26)    | 0.447               |
| Average Syllable Duration                  | 0.38 (0.57)         | 0.29 (0.26)         | 0.29 (0.18)         | 0.55 (1.00)         | 0.45 (0.50)         | 0.17                |
| Hesitation Ratio                           | 0.45 (0.14)         | 0.43 (0.13)         | 0.42 (0.11)         | 0.47 (0.13)         | 0.54 (0.16)         | 0.001 <sup>d</sup>  |
| <b>Prosodic and Voice Quality Features</b> |                     |                     |                     |                     |                     |                     |
| Loudness (Mean)                            | 0.19 (0.13)         | 0.20 (0.11)         | 0.21 (0.13)         | 0.19 (0.14)         | 0.16 (0.13)         | 0.557               |
| HNR (Mean)                                 | 6.48 (1.89)         | 6.39 (1.80)         | 6.50 (1.46)         | 6.29 (2.08)         | 7.00 (2.18)         | 0.49                |
| Jitter (Mean)                              | 0.03 (0.01)         | 0.03 (0.01)         | 0.03 (0.01)         | 0.03 (0.01)         | 0.03 (0.01)         | 0.733               |
| Shimmer (Mean)                             | 1.19 (0.20)         | 1.21 (0.15)         | 1.16 (0.20)         | 1.17 (0.25)         | 1.15 (0.22)         | 0.524               |
| <b>Articulatory Features</b>               |                     |                     |                     |                     |                     |                     |
| F1 Frequency (Mean)                        | 630.91<br>(96.70)   | 637.51<br>(74.78)   | 618.36<br>(91.86)   | 618.93<br>(122.27)  | 645.04<br>(108.61)  | 0.612               |
| F1 Frequency (Std. Dev.)                   | 0.31 (0.06)         | 0.31 (0.05)         | 0.31 (0.05)         | 0.31 (0.07)         | 0.30 (0.06)         | 0.877               |
| F1 Bandwidth (Mean)                        | 1318.28<br>(158.06) | 1334.80<br>(98.83)  | 1303.87<br>(150.35) | 1308.59<br>(225.02) | 1305.81<br>(170.30) | 0.758               |
| F1 Bandwidth (Std. Dev.)                   | 0.16 (0.03)         | 0.16 (0.02)         | 0.16 (0.03)         | 0.15 (0.03)         | 0.16 (0.03)         | 0.811               |
| F2 Frequency (Mean)                        | 1667.26<br>(205.50) | 1689.64<br>(135.81) | 1642.40<br>(201.31) | 1646.01<br>(282.54) | 1668.05<br>(223.68) | 0.682               |
| F2 Frequency (Std. Dev.)                   | 0.14 (0.02)         | 0.14 (0.02)         | 0.14 (0.02)         | 0.14 (0.03)         | 0.14 (0.03)         | 0.623               |
| F2 Bandwidth (Mean)                        | 1053.66<br>(134.93) | 1058.96<br>(91.15)  | 1028.31<br>(129.50) | 1052.00<br>(188.38) | 1068.16<br>(140.98) | 0.739               |
| F2 Bandwidth (Std. Dev.)                   | 0.28 (0.05)         | 0.29 (0.04)         | 0.29 (0.04)         | 0.27 (0.06)         | 0.27 (0.05)         | 0.11                |

Values are represented as Mean (SD). The p-values are from Likelihood Ratio (LR) tests. If the LR test showed a significant difference, then a linear mixed effect model was performed to evaluate the group differences.

<sup>a</sup> HC > Mild AD; <sup>b</sup> HC > Mild AD ProAD > Mild AD; <sup>c</sup> PreAD > MildAD; <sup>d</sup> MildAD > HC; HNR: Harmonics to Noise Ratio, ProAD: Prodromal AD, PreAD: Preclinical AD, ProAD: Prodromal AD, MildAD: Mild-to-moderate AD dementia, HC: Age-matched healthy controls.

## Convergent validity

### 1. Banking Application

#### Supplementary Table 10: Relationship between Banking App Features and “Managing Finances” Functional Domain Score

| Features                          | Managing finances       |
|-----------------------------------|-------------------------|
| Correct attempts                  | -0.06 (0.12), $p=0.599$ |
| Correct PIN attempts              | -0.05 (0.12), $p=0.674$ |
| Correct amount attempts           | -0.04 (0.08), $p=0.564$ |
| Total correct duration [s]        | 0.55 (0.19), $p<0.01$   |
| Total correct PIN duration [s]    | 0.41 (0.16), $p=0.014$  |
| Total correct amount duration [s] | 0.45 (0.12), $p<0.001$  |

The estimates (SE) and p-values are from linear regression analyses.

#### Supplementary Figure 2: Associations between Banking App Features and “Managing Finances” Functional Domain Score

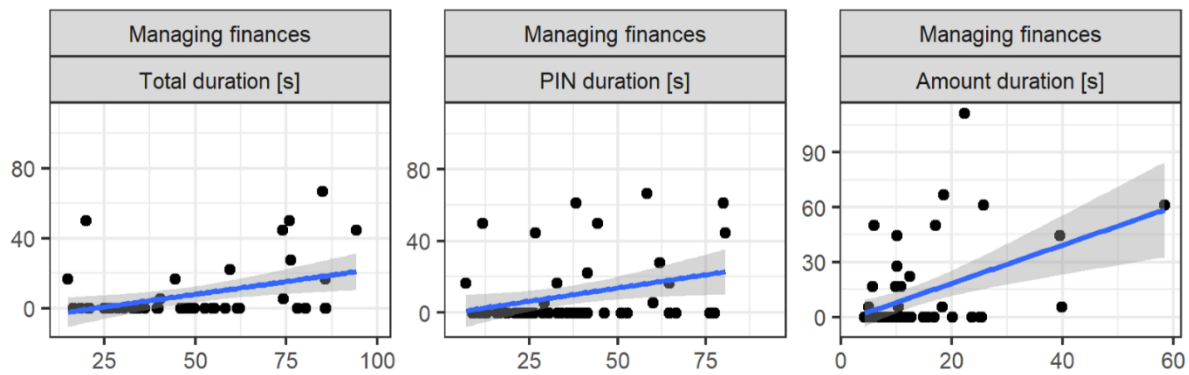

#### Supplementary Figure 3: Correlation matrix showing Pearson correlation coefficient for Banking App features with statistical significance

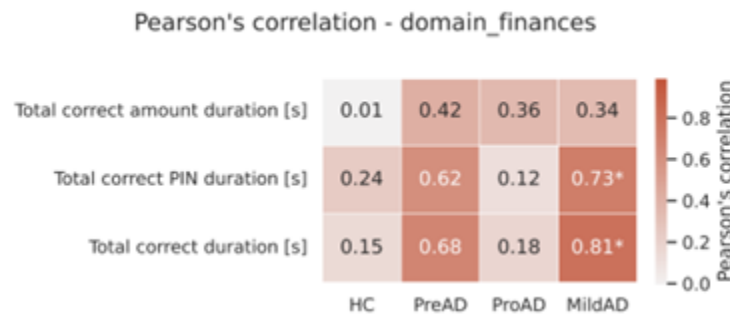

\*: $p<0.05$ . The association might not be linear, and the p-value is indicative only. PreAD: Preclinical AD, ProAD: Prodromal AD, MildAD: Mild-to-moderate AD dementia, HC: Age-matched healthy controls.

## 2. Fitbit

### Supplementary Figure 4: Investigation of associations between Fitbit Features and "Sleep Quality", "Gait" Functional Domain Scores

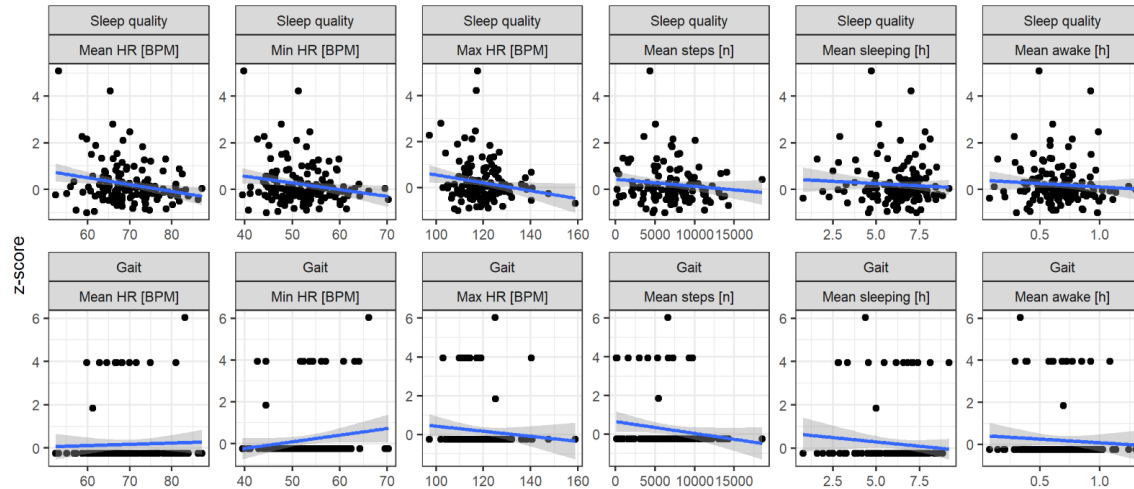

HR: Heart Rate, BPM: Beat per minute

### Supplementary Figure 5: Correlation matrix showing Pearson correlation coefficient for Fitbit features with statistical significance

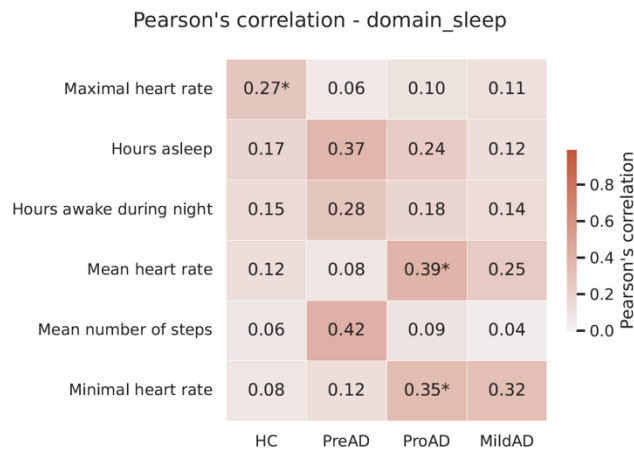

\*:  $p < 0.05$ . The association might not be linear, and the p-value is indicative only. PreAD: Preclinical AD, ProAD: Prodromal AD, MildAD: Mild-to-moderate AD dementia, HC: Age-matched healthy controls.



**Supplementary Table 11: Investigation of relationships between Fitbit features and related Functional Domain Scores**

| <b>Features</b>          | <b>Sleep quality &amp; circadian rhythms</b> | <b>Gait</b>           |
|--------------------------|----------------------------------------------|-----------------------|
| Mean heart rate          | -0.21 (0.07), p<0.01                         | 0.03 (0.08), p=0.745  |
| Minimal heart rate       | -0.17 (0.08), p<0.05                         | 0.12 (0.08), p=0.140  |
| Maximal heart rate       | -0.17 (0.08), p<0.05                         | -0.05 (0.08), p=0.560 |
| Mean number of steps     | -0.15 (0.09), p=0.095                        | -0.09 (0.09), p=0.312 |
| Hours asleep             | -0.08 (0.08), p=0.349                        | -0.05 (0.08), p=0.581 |
| Hours awake during night | -0.07 (0.08), p=0.405                        | -0.04 (0.08), p=0.657 |

The estimates (SE) and p-values are from linear regression analyses.

### 3. Activity

**Supplementary Figure 6: Investigation of associations between Axivity Features and “Sleep Quality”, “Gait” Functional Domain Scores. Regression lines have been plotted for consistency with the analyses of the other device.**

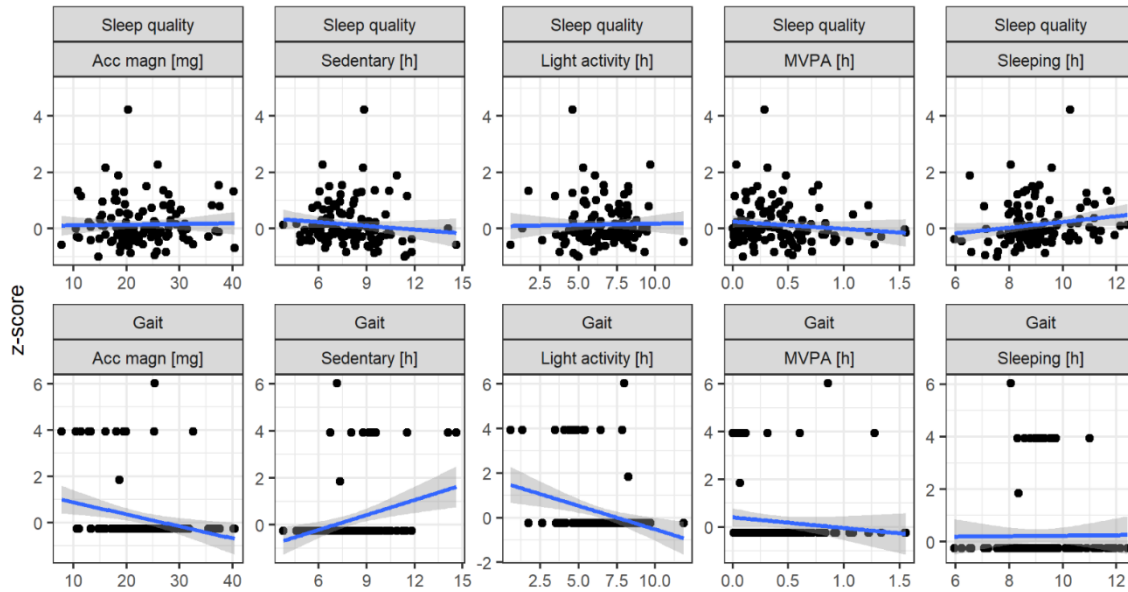

MVPA: Moderate-to-vigorous physical activity per day

**Supplementary Figure 7: Correlation matrix showing Pearson correlation coefficient for Activity features with significance**

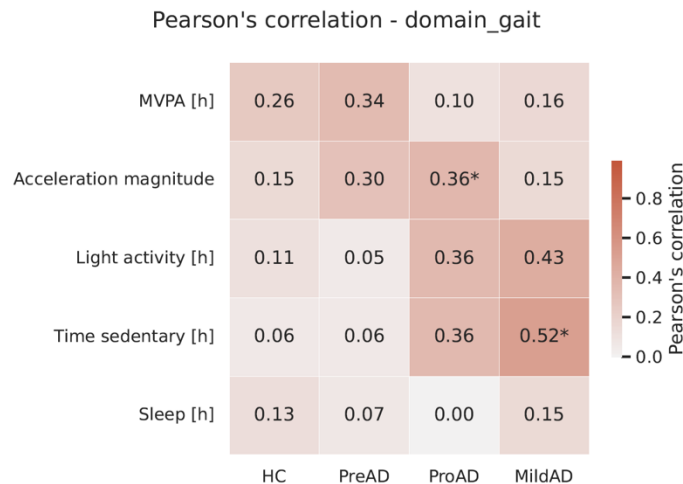

\*:  $p < 0.05$ . The association might not be linear, and the p-value is indicative only. PreAD: Preclinical AD, ProAD: Prodromal AD, MildAD: Mild-to-moderate AD dementia, HC: Age-matched healthy controls.

**Supplementary Table 12: Investigation of relationships between Activity features and related Functional Domain Score**

| <b>Features</b>        | <b>Sleep quality &amp; circadian rhythms</b> | <b>Gait</b>           |
|------------------------|----------------------------------------------|-----------------------|
| Acceleration magnitude | -0.01 (0.1), p=0.940                         | -0.16 (0.08), p=0.051 |
| Time sedentary [h]     | -0.08 (0.1), p=0.387                         | 0.2 (0.08), p=0.013   |
| Light activity [h]     | 0.01 (0.1), p=0.905                          | -0.21 (0.08), p=0.012 |
| MVPA [h]               | -0.14 (0.1), p=0.189                         | -0.05 (0.09), p=0.588 |
| Sleep [h]              | 0.15 (0.1), p=0.143                          | 0.02 (0.09), p=0.797  |

MVPA: Moderate-to-vigorous physical activity per day.

The estimates (SE) and p-values are from linear regression analyses.

4. Physilog (Dual Task)

**Supplementary Table 13: Relationship between DTE of various gait parameters and divided attention question from the ECog scale presented per cohort.**

| <b>Executive functioning: divided attention</b> |                            |                            |                            |                              |
|-------------------------------------------------|----------------------------|----------------------------|----------------------------|------------------------------|
| <b>Feature (DTE)</b>                            | <b>Cohort</b>              |                            |                            |                              |
|                                                 | <b>HC</b>                  | <b>PreAD</b>               | <b>ProAD</b>               | <b>MildAD</b>                |
| AVG – Gait speed                                | -                          | -0.032<br>(0.069)<br>p=0.6 | -0.014<br>(0.050)<br>p=0.7 | 0.163 (0.034)<br>p=0.0001    |
| AVG – Gait cycle time                           | 0.009 (0.024)<br>p=0.7     | 0.035 (0.114)<br>p=0.8     | -0.001<br>(0.025)<br>p=0.9 | -0.095<br>(0.022)<br>p=0.001 |
| SD – Gait speed                                 | -0.012<br>(0.009)<br>p=0.2 | -0.009<br>(0.032)<br>p=0.8 | 0.039 (0.017)<br>p=0.028   | -0.010<br>(0.016)<br>p=0.5   |
| SD – Gait cycle time                            | 0.001 (0.002)<br>p=0.3     | 0.013 (0.013)<br>p=0.3     | 0.001 (0.001)<br>p=0.3     | -0.003<br>(0.001)<br>p=0.013 |
| SD - Stance                                     | -                          | -0.012<br>(0.025)<br>p=0.5 | 0.007 (0.005)<br>p=0.2     | -0.014<br>(0.005)<br>p=0.016 |
| SD – Double support                             | -0.002<br>(0.002)<br>p=0.2 | -0.021<br>(0.022)<br>p=0.3 | 0.005 (0.003)<br>p=0.09    | -0.013<br>(0.005)<br>p=0.013 |
| SD – Foot flat rate                             | 0.002 (0.008)<br>p=0.8     | -0.015<br>(0.022)<br>p=0.5 | 0.005 (0.013)<br>p=0.7     | -0.030<br>(0.025)<br>p=0.2   |

DTE: Dual Task Effect, Ecog: Everyday Cognition Scale, PreAD: Preclinical AD, ProAD: Prodromal AD, MildAD: Mild-to-moderate AD dementia, HC: Age-matched healthy controls.

The estimates (SE) and p-values are from linear regression analyses.

**Supplementary Figure 8: Relationship between DTE of various gait parameters and divided attention question from ECog scale presented per cohort.**

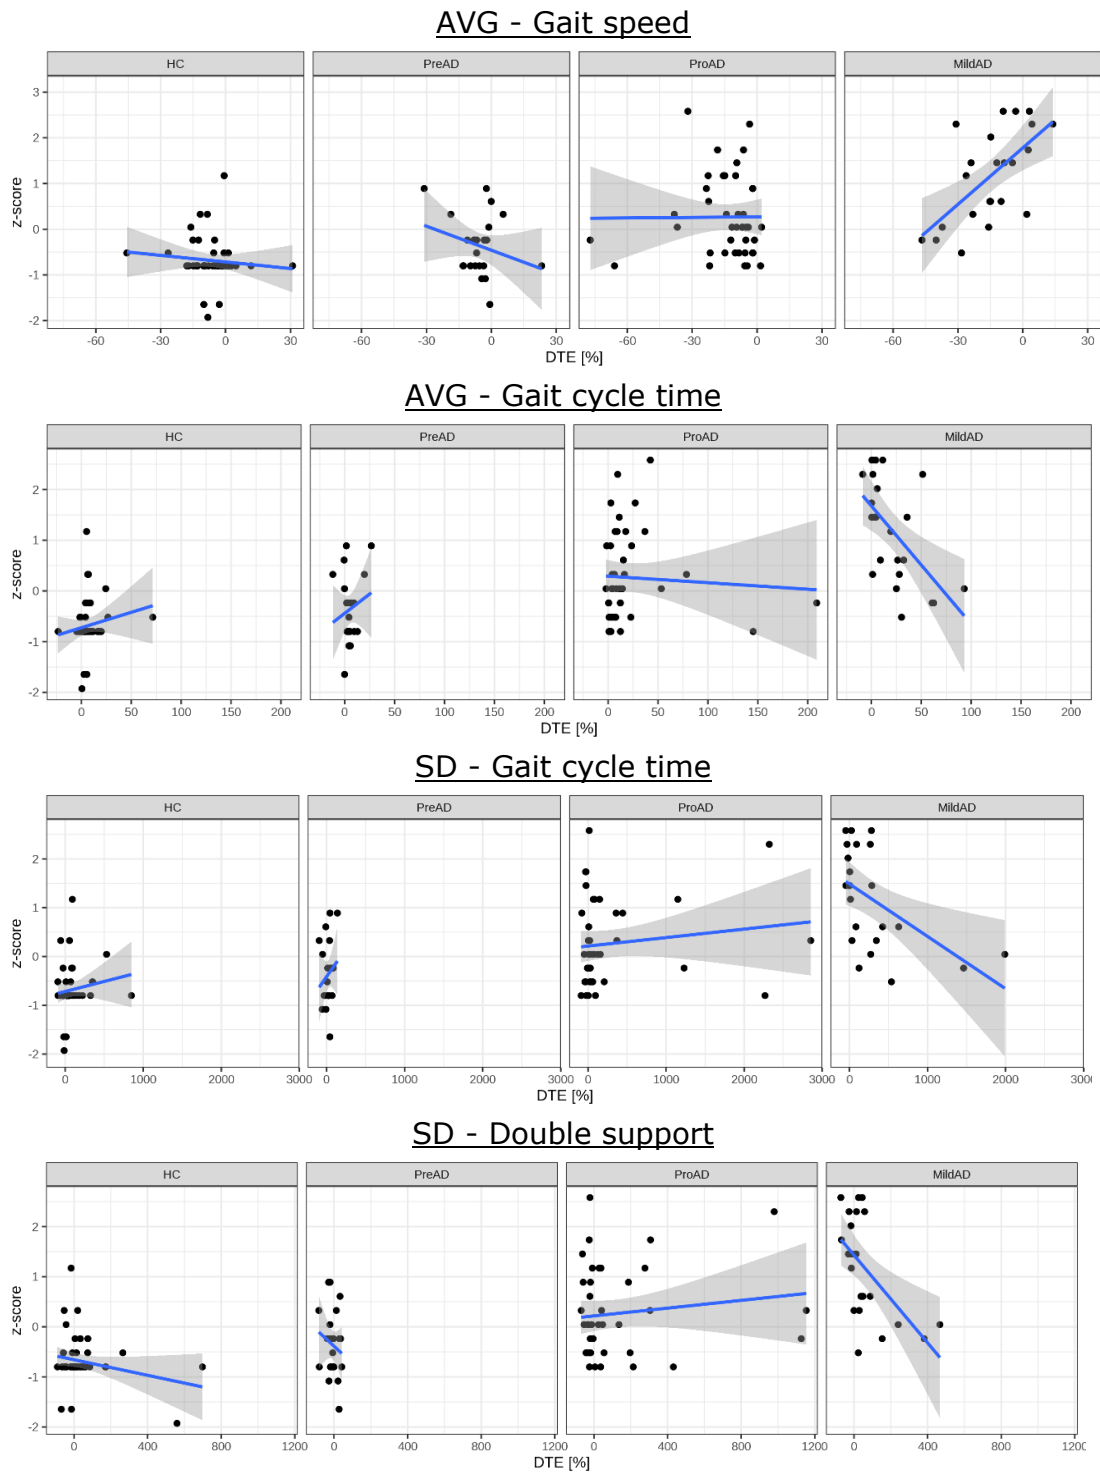

DTE: Dual Task Effect, Ecog: Everyday Cognition Scale. PreAD: Preclinical AD, ProAD: Prodromal AD, MildAD: Mild-to-moderate AD dementia, HC: Age-matched healthy controls.

**Supplementary Figure 9: Correlation matrix showing Pearson correlation coefficient for DTE features with significance of Ecog Divided Attention Domain Question and Motor-cognitive Dual Tasking Test Parameters.**

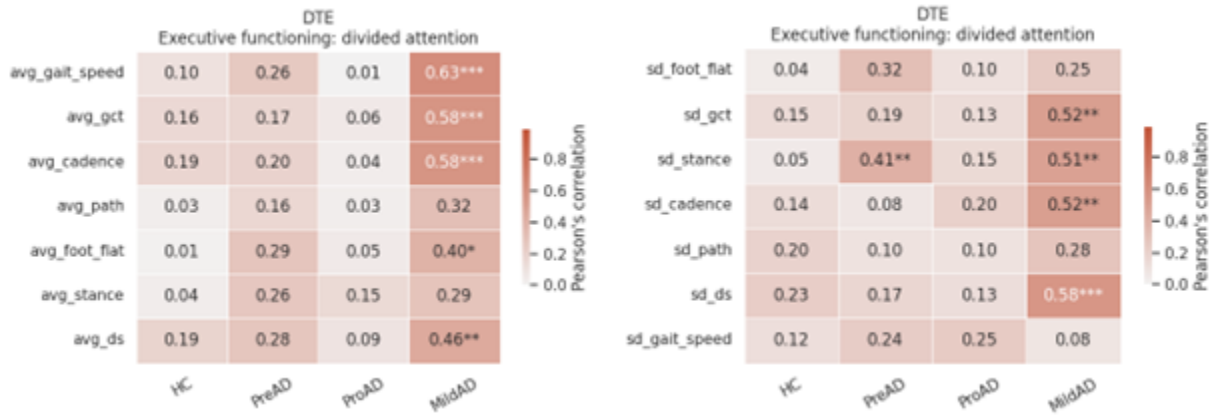

DTE: Dual Task Effect, Ecog: Everyday Cognition Scale. \*:p<0.05; \*\*: P<0.01;\*\*\*:P<0.001. The association might not be linear, and the p-value is indicative only.

## 5. Physilog (Timed up-and-go, TUG)

This is the example where it was not appropriate to correlate standard clinical outcome with RMT features; hence, no linear regression estimates nor Pearson correlation coefficients were calculated. This is due to low granularity of established clinical measure (EQ5D mobility question).

### Supplementary Figure 10: Comparison between the EQ5D mobility question (left) and the TUG total time feature (right)

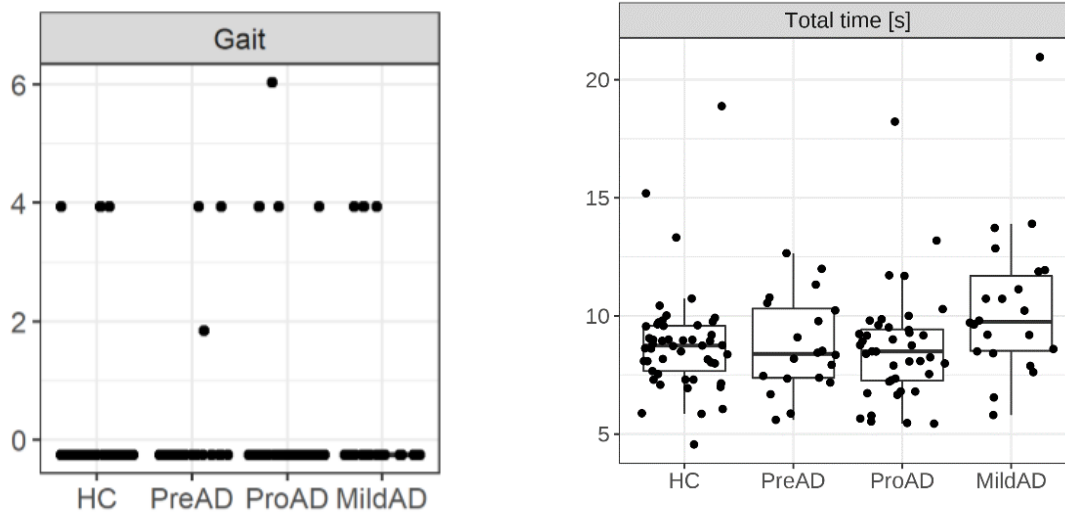

EQ5D: European Quality of Life, 5-Dimension, TUG: Timed up-and-go, PreAD: Preclinical AD, ProAD: Prodromal AD, MildAD: Mild-to-moderate AD dementia, HC: Age-matched healthy controls.

6. Altoida

**Supplementary Figure 11: Associations between the Altoida Features DNS score (main feature) and DNS-amyloid score with the explored Functional Domain Score**

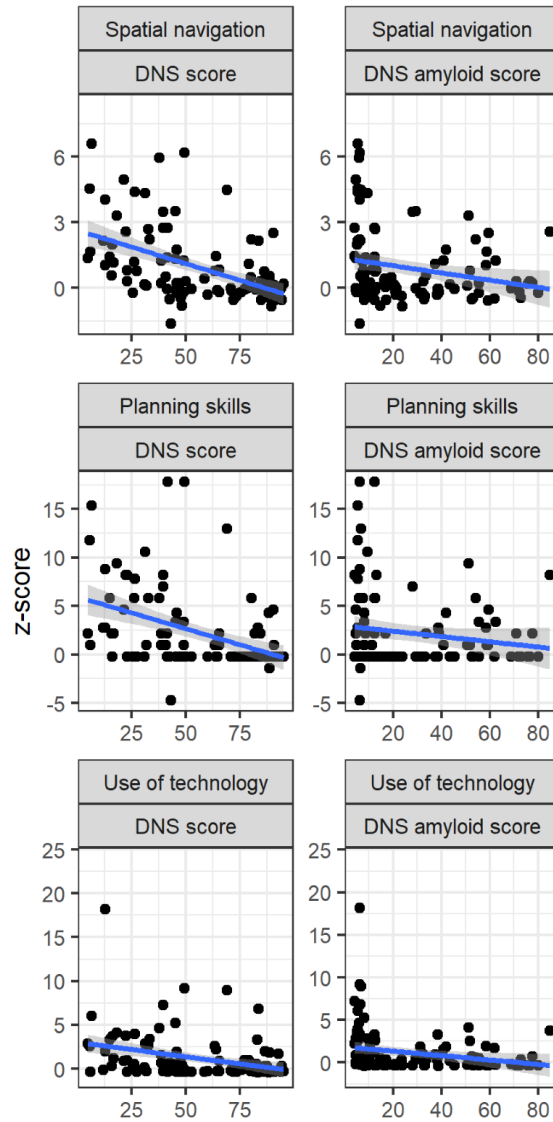

DNS: Digital Neuro Signature



## Supplementary Figure 12: Correlation matrix showing Pearson correlation coefficient for Altoida features with significance

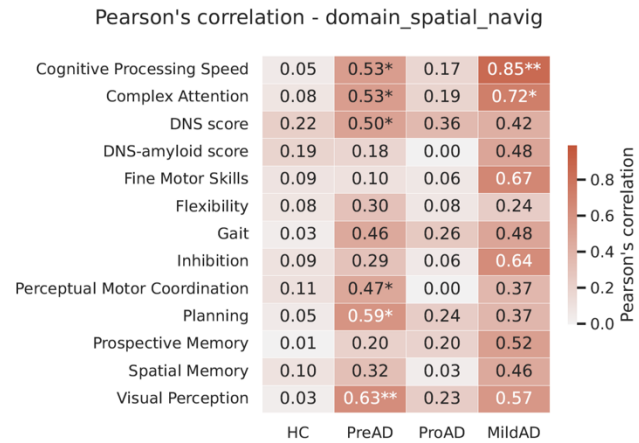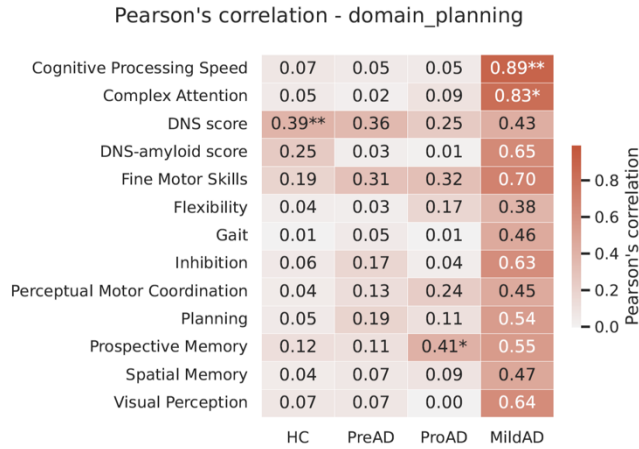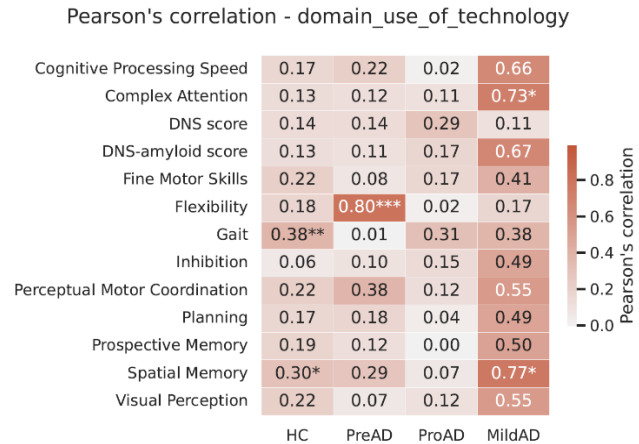

\*: $p < 0.05$ ; \*\*: $p < 0.01$ ; \*\*\*: $p < 0.001$ . The association might not be linear, and the p-value is indicative only. PreAD: Preclinical AD, ProAD: Prodromal AD, MildAD: Mild-to-moderate AD dementia, HC: Age-matched healthy controls.

## Supplementary Figure 13: Visualization of the found associations between the Altoida Features and the Functional Domain Scores

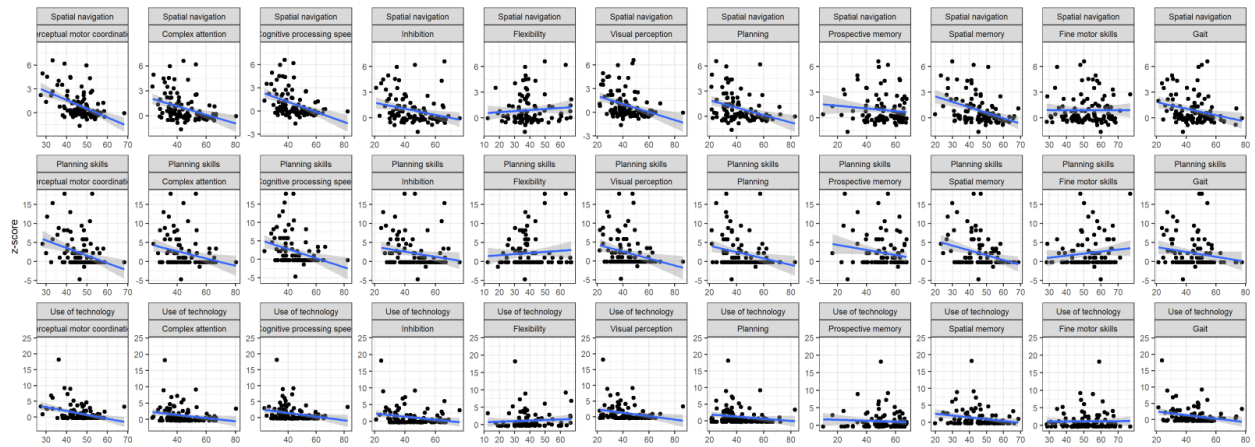

**Supplementary Table 14: Relationships between the Altoida Features and Functional Domain Scores**

| <b>Features</b>               | <b>Spatial navigation &amp; memory</b> | <b>Planning skills</b> | <b>Use of technology</b> |
|-------------------------------|----------------------------------------|------------------------|--------------------------|
| DNS score                     | -0.57 (0.11), p<0.001                  | -0.44 (0.1), p<0.001   | -0.35 (0.16), p=0.03     |
| DNS-amyloid score             | -0.28 (0.13), p=0.03                   | -0.16 (0.12), p=0.19   | -0.34 (0.17), p=0.049    |
| Perceptual Motor Coordination | -0.6 (0.11), p<0.001                   | -0.37 (0.11), p<0.001  | -0.52 (0.16), p<0.001    |
| Complex Attention             | -0.45 (0.12), p<0.001                  | -0.29 (0.11), p=0.01   | -0.37 (0.17), p=0.03     |
| Cognitive Processing Speed    | -0.53 (0.11), p<0.001                  | -0.35 (0.11), p<0.001  | -0.36 (0.17), p=0.03     |
| Inhibition                    | -0.34 (0.12), p=0.01                   | -0.21 (0.11), p=0.06   | -0.42 (0.16), p=0.01     |
| Flexibility                   | 0.1 (0.13), p=0.42                     | 0.1 (0.12), p=0.41     | 0.09 (0.17), p=0.62      |
| Visual Perception             | -0.48 (0.12), p<0.001                  | -0.31 (0.11), p=0.01   | -0.45 (0.17), p=0.01     |
| Planning                      | -0.45 (0.12), p<0.001                  | -0.3 (0.12), p=0.01    | -0.25 (0.17), p=0.15     |
| Prospective Memory            | -0.16 (0.13), p=0.22                   | -0.2 (0.11), p=0.08    | -0.03 (0.18), p=0.85     |
| Spatial Memory                | -0.53 (0.12), p<0.001                  | -0.37 (0.11), p<0.001  | -0.37 (0.17), p=0.03     |
| Fine Motor Skills             | 0.01 (0.13), p=0.93                    | 0.17 (0.12), p=0.15    | 0.05 (0.18), p=0.79      |
| Gait                          | -0.39 (0.12), p<0.001                  | -0.25 (0.12), p=0.04   | -0.49 (0.17), p<0.001    |

DNS: Digital Neuro Signature. The estimates (SE) and p-values are from linear regression analyses.

7. Mezurio

**Supplementary Table 15: Association of Functional domain score, "Word finding difficulty" with Mezurio Story Time measures**

| <b>Domain = Word Finding Difficulty</b>    | <b>Estimate (SE)</b> | <b>p-value</b> |
|--------------------------------------------|----------------------|----------------|
| <b>Speech Timing Features</b>              |                      |                |
| Articulation Rate                          | 0.08 (0.08)          | 0.34           |
| Speaking Rate                              | 0.12 (0.08)          | 0.15           |
| Recording Duration                         | 0.2 (0.08)           | 0.02           |
| Number of Syllables                        | 0.23 (0.08)          | 0.01           |
| Number of Pauses                           | 0.21 (0.08)          | 0.01           |
| Average Syllable Duration                  | -0.09 (0.09)         | 0.36           |
| Hesitation Ratio                           | -0.15 (0.08)         | 0.07           |
| <b>Prosodic and Voice Quality Features</b> |                      |                |
| Loudness (Mean)                            | 0.03 (0.08)          | 0.75           |
| HNR (Mean)                                 | -0.09 (0.07)         | 0.22           |
| Jitter (Mean)                              | -0.03 (0.08)         | 0.7            |
| Shimmer (Mean)                             | 0.05 (0.08)          | 0.51           |
| <b>Articulatory Features</b>               |                      |                |
| F1 Frequency (Mean)                        | -0.09 (0.08)         | 0.24           |
| F1 Frequency (Std. Dev.)                   | 0.06 (0.08)          | 0.47           |
| F1 Bandwidth (Mean)                        | -0.03 (0.08)         | 0.74           |
| F1 Bandwidth (Std. Dev.)                   | 0.02 (0.08)          | 0.77           |
| F2 Frequency (Mean)                        | -0.04 (0.08)         | 0.65           |
| F2 Frequency (Std. Dev.)                   | 0.04 (0.08)          | 0.63           |
| F2 Bandwidth (Mean)                        | -0.09 (0.08)         | 0.29           |
| F2 Bandwidth (Std. Dev.)                   | 0.07 (0.08)          | 0.42           |

For this analysis, linear regression with averaged Story Time audio measures was used, and a complete analysis using the longitudinal information of this data will be performed at the time of study completion; HNR: Harmonics to Noise Ratio.

**Supplementary Figure 14: Visualization of the found associations between the Mezurio Story Time Features and the Word Finding Difficulty as the functional domain score.**

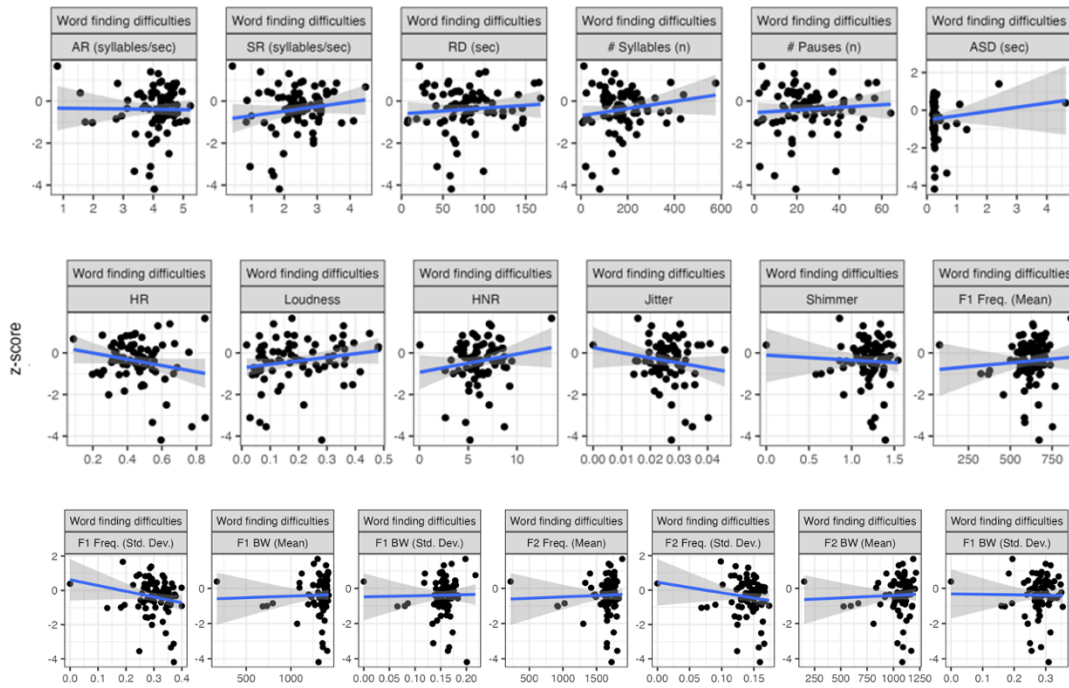

HNR: Harmonics to Noise Ratio.

## Supplementary Figure 15: Correlation matrix showing Pearson correlation coefficient for Mezurio features with significance

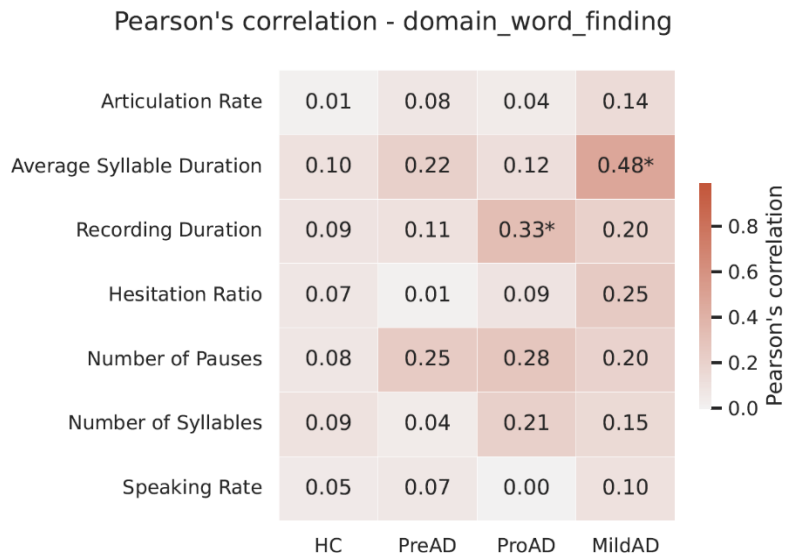

\*: $p < 0.05$ ; \*\*: $p < 0.01$ ; \*\*\*: $p < 0.001$ . The association might not be linear, and the p-value is indicative only. PreAD: Preclinical AD, ProAD: Prodromal AD, MildAD: Mild-to-moderate AD dementia, HC: Age-matched healthy controls.

## SUPPLEMENTARY REFERENCES

1. Muurling M, de Boer C, Hinds C, et al. Feasibility and usability of remote monitoring in Alzheimer's disease. *Digital Health*. 10:20552076241238133 (2024).
2. Jutten, R. J. et al. Detecting functional decline from normal aging to dementia: development and validation of a short version of the Amsterdam IADL Questionnaire. *Alzheimers Dement. (Amst)*. **8**, 26–35 (2017).
3. Folstein, M. F., Folstein, S. E., McHugh, P. R. 'Mini-mental state'. A practical method for grading the cognitive state of patients for the clinician. *J Psychiatr Res*. **12**, 189–198 (1975).
4. Rey, A. L'examen psychologique dans les cas d'encéphalopathie traumatique. (Les problems.) [The psychological examination in cases of traumatic encephalopathy. Problems]. *Arch Psychologie*. **28**, 215–85 (1941).
5. Shin, M.-S., Park, S.-Y., Park, S.-R., Seol, S.-H., Kwon, J. S. Clinical and empirical applications of the Rey-Osterrieth Complex Figure Test. *Nat Protoc*. **1**, 892–9 (2006).
6. Farias, S. T. et al. The measurement of everyday cognition (ECog): revisions and updates. *Alzheimer Dis Assoc Disord*. **35**, 258–64 (2021).
7. EuroQol Group. EuroQol--a new facility for the measurement of health-related quality of life. *Health Policy*. **16**, 199–208 (1990).
8. Galasko, D. et al. An inventory to assess activities of daily living for clinical trials in Alzheimer's disease. *Alzheimer Dis Assoc Disord*. **11**, 33 (1997).
9. Buysse, D. J., Reynolds, C. F., Monk, T. H., Berman, S. R., Kupfer, D. J. The Pittsburgh Sleep Quality Index: a new instrument for psychiatric practice and research. *Psychiatry Res*. **28**, 193–213 (1989).
10. Johns, M. W. A new method for measuring daytime sleepiness: the Epworth sleepiness scale. *Sleep*. **14**, 540–5 (1991).
11. Cummings, J. L. The Neuropsychiatric Inventory. *Neurology* 48, 10S-16S (1997).
12. Kaplan; Goodglass, Harold; Weintraub, Sandra (1983). Boston Naming Test. Philadelphia: Lea & Febiger.
13. Muurling, M., et al. Remote monitoring technologies in Alzheimer's disease: design of the RADAR-AD study. *Alzheimers Res Ther*. 13:89 (2021).
